# Supplementary material
Source: MDPI journal article supplement (https://www.mdpi.com/2076-3417/11/12/5465)
Supplement: s1 [file s1]

## SUPPLEMENTARY INFORMATION

# Influence of Preparation Conditions on the Catalytic Performance of Mo/H-ZSM-5 for Methane Dehydroaromatization

Maria Teresa Portilla <sup>1,2</sup>, Francisco J. Llopis <sup>3</sup>, Manuel Moliner <sup>1</sup> and Cristina Martinez <sup>1,\*</sup>

<sup>1</sup> Instituto de Tecnología Química (UPV-CSIC), Universitat Politècnica de València—Consejo Superior de Investigaciones Científicas, Av. De los Naranjos s/n, 46022 Valencia, Spain; [mmoliner@itq.upv.es](mailto:mmoliner@itq.upv.es) (M.M.); [cmsanche@itq.upv.es](mailto:cmsanche@itq.upv.es) (C.M.)

<sup>2</sup> Technical Department of International Flavors & Fragrances (IFF), Av. Felipe Klein 2, 12580 Benicarló, Spain; [Teresa.Portilla@iff.com](mailto:Teresa.Portilla@iff.com)

<sup>3</sup> Departamento Ingeniería Química, Universitat de València (UV), Av Universidad s/n, 46100 Burjassot, Spain; [francisco.llopis@uv.es](mailto:francisco.llopis@uv.es)

\* Correspondence: [cmsanche@itq.upv.es](mailto:cmsanche@itq.upv.es)

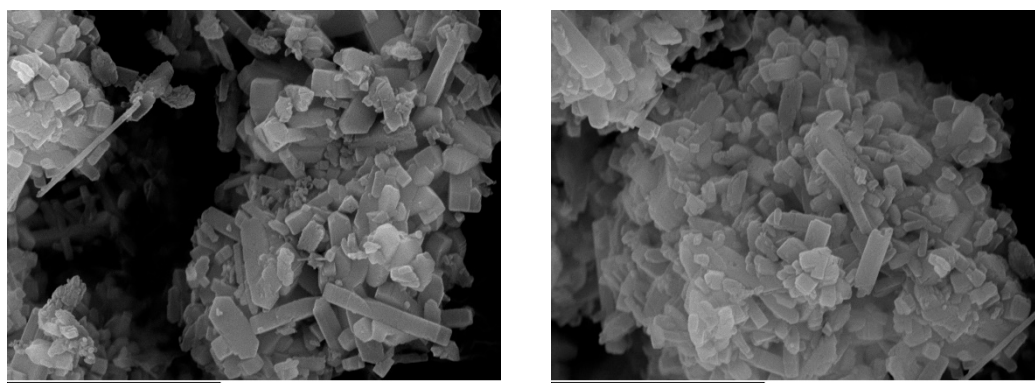

**Figure S1.** FESEM images of the parent ZSM-5 zeolite.

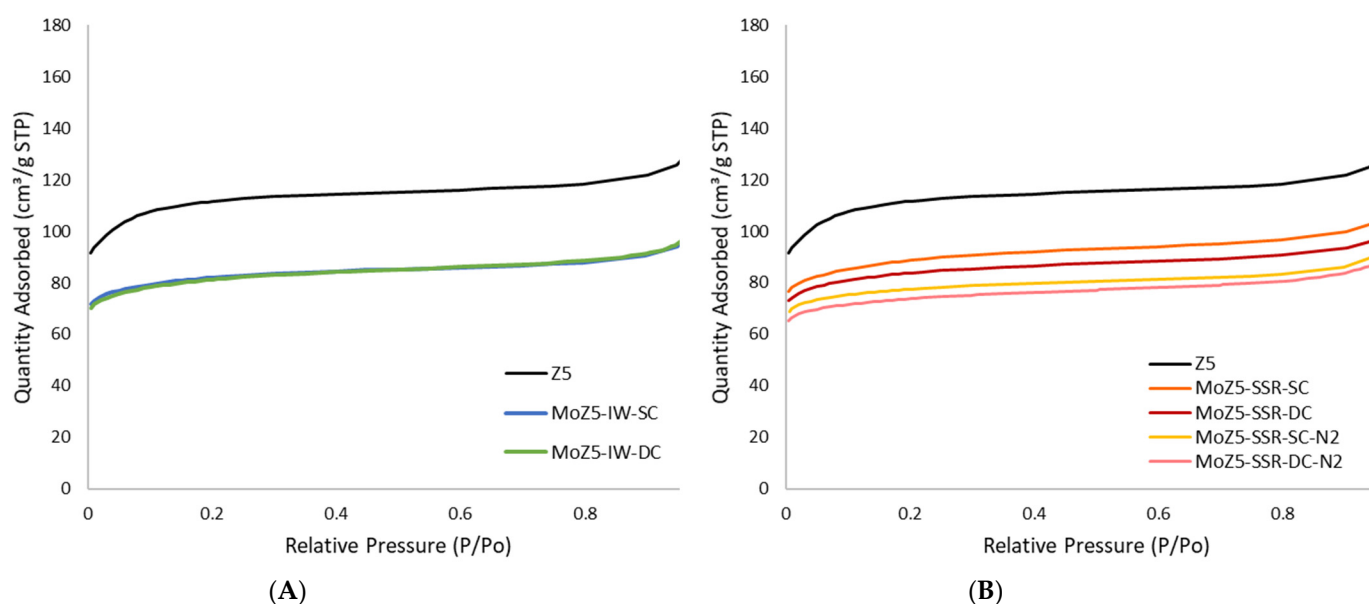

**Figure S2.** N<sub>2</sub> adsorption isotherms of the parent ZSM-5 zeolite and the Mo-loaded catalysts. (A) Samples prepared by incipient wetness impregnation (IW); (B) samples prepared by solid state reaction (SSR).

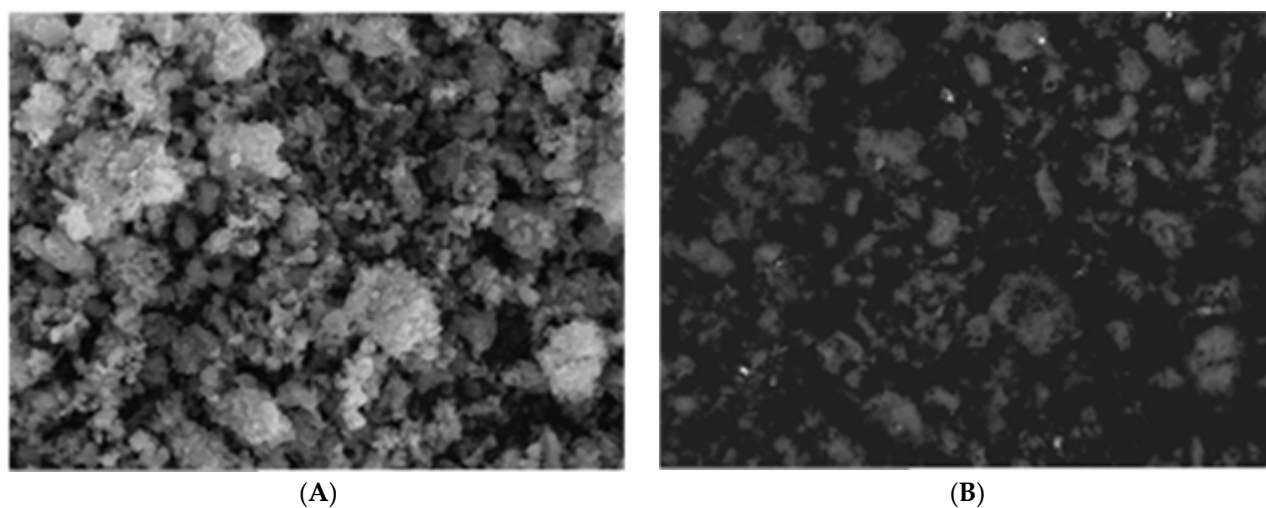

**Figure S3.** SEM images using a secondary electron detector (A) and a backscattered electron detector (B) for the MoZ5-SSR-SC catalyst after being analyzed by H<sub>2</sub>-TPR.

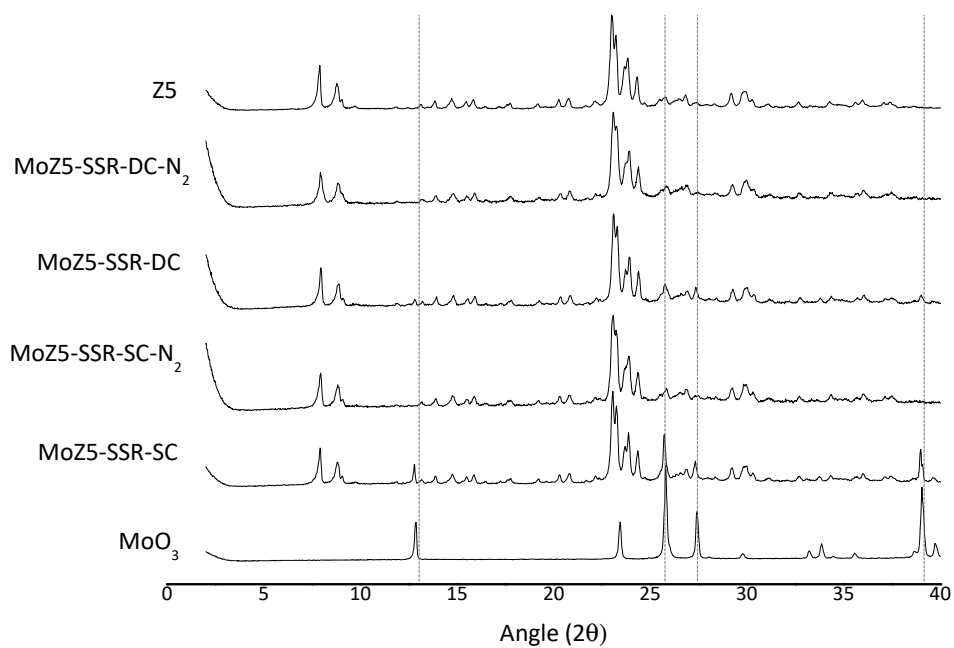

**Figure S4.** PXRD patterns of the Mo/ZSM-5 catalysts prepared by solid state ion exchange reaction (SSR). The most characteristic peaks related to the presence of MoO<sub>3</sub> are marked with a dotted line.

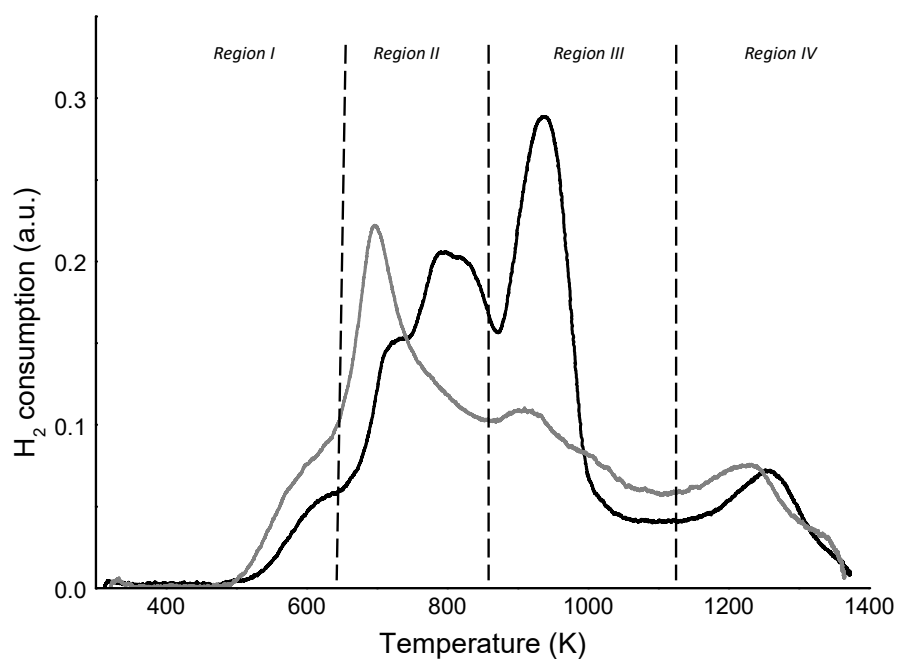

(a)

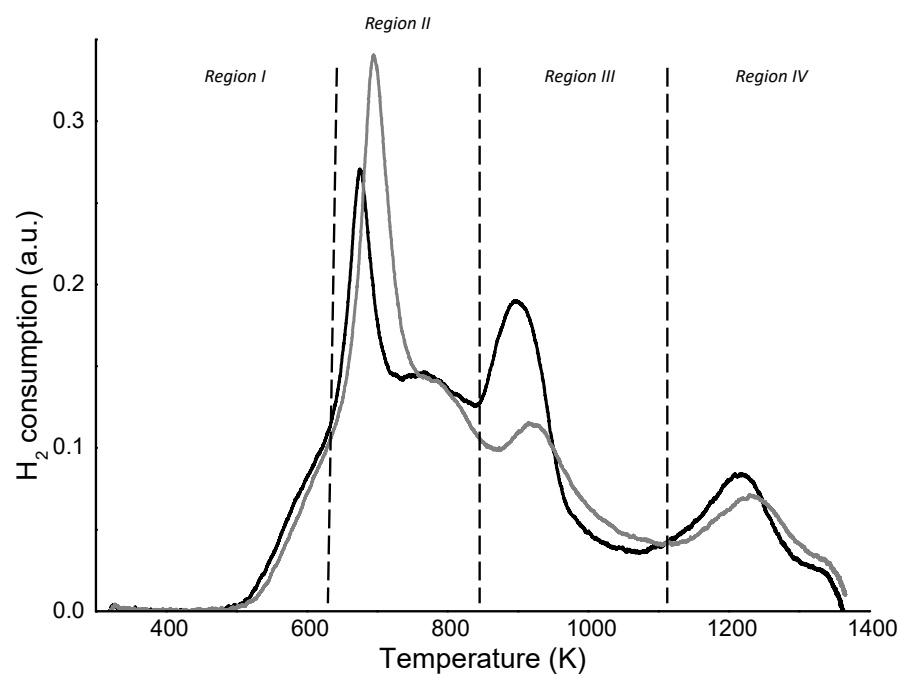

(b)

**Figure S5.** H<sub>2</sub>-TPR profiles for the Mo/ZSM-5 catalyst prepared by solid state ion exchange reaction calcined in static conditions (A), MoZ5-SSR-SC (black line) and MoZ5-SSR-SC-N<sub>2</sub> (grey line), and in dynamic conditions (B), MoZ5-SSR-DC (black line) and MoZ5-SSR-DC-N<sub>2</sub> (grey line).
